# Supplementary material for: Nutrient Recovery from Algae Using Mild Oxidative Treatment and Ion Exchange
Source: PubMed Central journal article supplement (PMC11151276; doi:10.1021/acssuschemeng.4c02658), 2024-05-20
Supplement: sc4c02658_si_001.pdf [file sc4c02658_si_001.pdf]

Supporting Information for:

## **Nutrient Recovery from Algae using Mild Oxidative Treatment and Ion Exchange**

Tobias C. Hull<sup>1,2</sup>, Kameron J. King<sup>3</sup>, Jacob S. Kruger<sup>2</sup>, Earl D. Christensen<sup>4</sup>, Ali Chamas<sup>2</sup>, Philip T. Pienkos<sup>5</sup>, and Tao Dong<sup>4\*</sup>

1. Advanced Energy Systems Graduate Program, Colorado School of Mines, Golden, CO 80401
2. Renewable Resources and Enabling Sciences Center, National Renewable Energy Laboratory, Golden, CO 80401 USA
3. Department of Civil and Environmental Engineering, Old Dominion University, Norfolk, VA 23529
4. Catalytic Carbon Transformation & Scale-Up Center, National Renewable Energy Laboratory, 15013 Denver West Parkway, Golden, CO 80401
5. Matereal, Inc. 1007 Savannah Ave., Pittsburgh, PA 15227

7 Pages

11 Tables

\*Corresponding author: [Tao.Dong@nrel.gov](mailto:Tao.Dong@nrel.gov)

**Table S1.** Amino acid profile of extracted algae solids. Amino acid profile was determined after acid hydrolysis by ion exchange chromatography with post-column ninhydrin derivatization. This analysis does not quantify methionine, cysteine, or tryptophan.

| <b>Amino Acid</b> | <b>mg AA / g<br/>biomass</b> |
|-------------------|------------------------------|
| Alanine           | 18.0                         |
| Arginine          | 12.7                         |
| ASX               | 9.1                          |
| GLX               | 27.1                         |
| Glycine           | 12.6                         |
| Histidine         | 4.6                          |
| Isoleucine        | 14.8                         |
| Leucine           | 28.0                         |
| Lysine            | 12.9                         |
| Phenylalanine     | 17.5                         |
| Proline           | 10.5                         |
| Serine            | 9.3                          |
| Threonine         | 11.8                         |
| Tyrosine          | 11.7                         |
| Valine            | 17.9                         |

**Table S2.** Lipid profile of extracted algae solids measured as fatty acid methyl esters.

| <b>FAME</b> | <b>mg / g<br/>biomass</b> |
|-------------|---------------------------|
| C8:0        | 0.20                      |
| C10:0       | 0.19                      |
| C12:0       | 0.17                      |
| C14:0       | 1.98                      |
| C15:0       | 0.09                      |
| C16:0       | 6.98                      |
| C16:1n11    | 0.43                      |
| C16:1n7     | 10.85                     |
| C16:1n6     | 0.00                      |
| C16:1n5     | 0.02                      |
| C16 other   | 0.61                      |
| C16:2       | 0.11                      |
| C17:0       | 0.05                      |
| C16:3       | 0.30                      |
| C16:4       | 0.31                      |
| C18:0       | 0.11                      |
| C18:1n9     | 2.49                      |
| C18:1n7     | 0.24                      |
| C18:2n6     | 1.54                      |
| C18:3n6     | 0.08                      |
| C20:3n6     | 0.18                      |
| C20:4n6     | 1.46                      |
| C20:5n3     | 7.85                      |
| C22:2       | 0.11                      |

**Table S3.** Carbohydrate profile of extracted algae solids measured by HPAEC-PAD system with PA-1 column/guard. <loq indicates that monomer was present but below detection limits. N/D indicates that monomer was not detected.

| <b>Monomer</b> | <b>mg/g biomass</b> |
|----------------|---------------------|
| Mannitol       | <loq                |
| Fucose         | <loq                |
| Rhamnose       | <loq                |
| Galactosamine  | <loq                |
| Arabinose      | <loq                |
| Glucosamine    | <loq                |
| Galactose      | 3.1                 |
| Glucose        | 12.1                |
| Mannose        | <loq                |
| Xylose         | N/D                 |
| Ribose         | <loq                |

**Table S4.** Numeric data for Figure 1. Reaction conditions: 0.5 g dry solids, 25 mL H<sub>2</sub>O, 200 °C, 2 bar O<sub>2</sub> partial pressure added upon reaching reaction temperature.

| Time (min) | C-Yield (% C) |             |                |               |         |       | N yield (% N) |         |       |
|------------|---------------|-------------|----------------|---------------|---------|-------|---------------|---------|-------|
|            | Formic acid   | Acetic acid | Propionic acid | Succinic acid | Alanine | SUM C | Ammonium      | Alanine | SUM-N |
| 0          | 0.0           | 0.0         | 0.0            | 0.0           | 3.8     | 3.8   | 10.4          | 9.4     | 19.8  |
| 10         | 0.9           | 0.2         | 0.3            | 0.0           | 0.2     | 1.7   | 39.5          | 0.6     | 40.1  |
| 20         | 2.0           | 1.3         | 0.7            | 0.6           | 0.0     | 4.6   | 50.2          | 0.0     | 50.2  |
| 40         | 3.0           | 2.9         | 1.6            | 2.4           | 0.0     | 9.9   | 81.3          | 0.0     | 81.3  |
| 60         | 2.9           | 2.4         | 0.8            | 2.1           | 0.0     | 8.2   | 80.4          | 0.0     | 80.4  |
| 120        | 2.7           | 2.6         | 0.7            | 0.7           | 0.0     | 6.7   | 80.7          | 0.0     | 80.7  |

**Table S5.** Numeric data for Figure 1, expressed as product concentration rather than as carbon and nitrogen molar yields. Reaction conditions: 0.5 g dry solids, 25 mL H<sub>2</sub>O, 200 °C, 2 bar O<sub>2</sub> partial pressure added upon reaching reaction temperature.

| Time (min) | Product (mg/L) |             |                |               |          |         |
|------------|----------------|-------------|----------------|---------------|----------|---------|
|            | Formic acid    | Acetic acid | Propionic acid | Succinic acid | Ammonium | Alanine |
| 0          | 0              | 0           | 0              | 0             | 160      | 690     |
| 10         | 260            | 40          | 50             | 0             | 590      | 40      |
| 20         | 570            | 230         | 110            | 100           | 750      | 0       |
| 40         | 850            | 550         | 240            | 380           | 1210     | 0       |
| 60         | 820            | 460         | 130            | 320           | 1200     | 0       |
| 120        | 760            | 500         | 100            | 115           | 1210     | 0       |

**Table S6.** Numeric data for Figure 2a and 2b. Reaction conditions: 0.5 g dry solids, 25 mL H<sub>2</sub>O 2 bar O<sub>2</sub> partial pressure added upon reaching reaction temperature, 40 minutes reaction time.

| Temperature<br>[C] | C-Yield (% C)  |                |                   |                  |         |          | N yield (% N) |         |           |
|--------------------|----------------|----------------|-------------------|------------------|---------|----------|---------------|---------|-----------|
|                    | Formic<br>acid | Acetic<br>acid | Propionic<br>acid | Succinic<br>acid | Alanine | SUM<br>C | Ammonium      | Alanine | SUM-<br>N |
| 175                | 2.1            | 1.0            | 0.5               | 0.6              | 0.2     | 4.4      | 25.5          | 0.5     | 26.0      |
| 200                | 3.0            | 2.9            | 1.6               | 2.4              | 0.0     | 9.9      | 81.0          | 0.0     | 81.0      |
| 225                | 1.6            | 2.2            | 1.1               | 1.7              | 0.0     | 6.6      | 82.4          | 0.0     | 82.4      |
| 250                | 0.9            | 2.8            | 0.9               | 1.9              | 0.0     | 6.5      | 81.0          | 0.0     | 81.0      |

**Table S7.** Numeric data for Figure 2a and 2b, expressed as product concentration rather than as carbon and nitrogen molar yields. Reaction conditions: 0.5 g dry solids, 25 mL H<sub>2</sub>O 2 bar O<sub>2</sub> partial pressure added upon reaching reaction temperature, 40 minutes reaction time.

| Temperature<br>[C] | Product (mg/L) |                |                   |                  |          |         |
|--------------------|----------------|----------------|-------------------|------------------|----------|---------|
|                    | Formic<br>acid | Acetic<br>acid | Propionic<br>acid | Succinic<br>acid | Ammonium | Alanine |
| 175                | 600            | 180            | 80                | 100              | 380      | 40      |
| 200                | 850            | 550            | 240               | 380              | 1210     | 0       |
| 225                | 450            | 410            | 170               | 270              | 1230     | 0       |
| 250                | 260            | 520            | 140               | 290              | 1210     | 0       |

**Table S8.** Numeric data for Figure 2c and 2d. Reaction conditions: 0.5 g dry solids, 25 mL H<sub>2</sub>O, 200 °C, 40 minutes reaction time.

| O <sub>2</sub><br>Pressure<br>(Bar) | C-Yield (% C)  |                |                   |                  |         |          | N yield (% N) |         |           |
|-------------------------------------|----------------|----------------|-------------------|------------------|---------|----------|---------------|---------|-----------|
|                                     | Formic<br>acid | Acetic<br>acid | Propionic<br>acid | Succinic<br>acid | Alanine | SUM<br>C | Ammonium      | Alanine | SUM-<br>N |
| 1                                   | 1.3            | 0.4            | 0.5               | 0.0              | 0.0     | 2.2      | 42.2          | 0.0     | 42.2      |
| 2                                   | 3.0            | 2.9            | 1.6               | 2.4              | 0.0     | 9.9      | 81.0          | 0.0     | 81.0      |
| 4                                   | 2.9            | 3.1            | 0.8               | 2.4              | 0.0     | 9.2      | 80.4          | 0.0     | 80.4      |
| 8                                   | 2.4            | 4.1            | 0.9               | 2.0              | 0.0     | 9.4      | 79.7          | 0.0     | 79.7      |

**Table S9.** Numeric data for Figure 2c and 2d, expressed as product concentration rather than as carbon and nitrogen molar yields. Reaction conditions: 0.5 g dry solids, 25 mL H<sub>2</sub>O, 200 °C, 40 minutes reaction time.

| O <sub>2</sub><br>Pressure<br>(bar) | Product (mg/L) |                |                   |                  |          |         |
|-------------------------------------|----------------|----------------|-------------------|------------------|----------|---------|
|                                     | Formic<br>acid | Acetic<br>acid | Propionic<br>acid | Succinic<br>acid | Ammonium | Alanine |
| 1                                   | 360            | 80             | 80                | 0                | 630      | 0       |
| 2                                   | 850            | 550            | 240               | 380              | 1210     | 0       |
| 4                                   | 830            | 580            | 120               | 380              | 1200     | 0       |
| 8                                   | 700            | 760            | 140               | 310              | 1190     | 0       |

**Table S10.** Numeric data for Figure 2e and 2f. Reaction conditions: 2 bar O<sub>2</sub> partial pressure added upon reaching reaction temperature, 200 °C, 40 minutes reaction time.

| Solids<br>[g/L] | C-Yield (% C)  |                |                   |                  |         | SUM<br>C | N yield (% N) |         |           |
|-----------------|----------------|----------------|-------------------|------------------|---------|----------|---------------|---------|-----------|
|                 | Formic<br>acid | Acetic<br>acid | Propionic<br>acid | Succinic<br>acid | Alanine |          | Ammonium      | Alanine | SUM-<br>N |
| 20              | 3.0            | 2.9            | 1.6               | 2.4              | 0.0     | 9.9      | 81.0          | 0.0     | 81.0      |
| 50              | 1.0            | 0.9            | 1.0               | 1.7              | 0.0     | 4.7      | 61.1          | 0.0     | 61.1      |
| 100             | 0.5            | 0.6            | 0.4               | 0.8              | 0.9     | 3.2      | 44.5          | 2.3     | 46.8      |
| 150             | 0.3            | 0.3            | 0.2               | 0.5              | 1.8     | 3.2      | 36.2          | 4.4     | 40.6      |
| 200             | 0.2            | 0.3            | 0.3               | 0.4              | 1.6     | 2.8      | 38.2          | 4.0     | 42.2      |

**Table S11.** Numeric data for Figure 2e and 2f, expressed as product concentration rather than as carbon and nitrogen molar yields. Reaction conditions: 2 bar O<sub>2</sub> partial pressure added upon reaching reaction temperature, 200 °C, 40 minutes reaction time.

| Solids<br>[g/L] | Product (mg/L) |                |                   |                  |          |         |
|-----------------|----------------|----------------|-------------------|------------------|----------|---------|
|                 | Formic<br>acid | Acetic<br>acid | Propionic<br>acid | Succinic<br>acid | Ammonium | Alanine |
| 20              | 850            | 550            | 240               | 380              | 1210     | 0       |
| 50              | 710            | 420            | 400               | 680              | 2280     | 0       |
| 100             | 780            | 570            | 320               | 590              | 3320     | 850     |
| 150             | 730            | 440            | 280               | 600              | 4050     | 2460    |
| 200             | 710            | 520            | 450               | 580              | 5700     | 2940    |
